# Supplementary material for: Optimizing the N Rate for Maize Forage to Balance Profits and N Ecological Stress
Source: MDPI journal article supplement (doi:10.3390/agronomy12030718), 2022-03-16
Supplement: s1 [file s1]

## **Supplementary Information**

Optimizing the N Rate for Maize Forage to Balance Profits and N Ecological Stress

Kun Han<sup>a</sup>, Peng Liu<sup>a\*</sup>

<sup>a</sup>State Key Laboratory of Crop Biology, Key Laboratory of Crop Water Physiology and Drought-tolerance Germplasm Improvement, College of Agronomy, Shandong Agricultural University, Taian, Shandong, China, 271018. \*Corresponding author.

Correspondence information: **Peng Liu**, State Key Laboratory of Crop Biology, Key Laboratory of Crop Water Physiology and Drought-tolerance Germplasm Improvement, College of Agronomy, Shandong Agricultural University, Taian, Shandong, China, 271018, E-mail addresses: liup@sdau.edu.cn, Tel.: +86-0538-8242653, Fax: +86-0538-8242653.

Table S1. The regression equations of forage yield, economic profit, ecological profit,  $\Delta_{\text{Soil}}(\text{NO}_3^--\text{N})$  based on the two-year measured data.

| Objective                                      | year | Regression equation                   | R <sup>2</sup> |
|------------------------------------------------|------|---------------------------------------|----------------|
| Forage yield                                   | 2017 | $Y = -0.0413x^2 + 33.05x + 14346$     | 0.98           |
| (kg ha <sup>-1</sup> )                         | 2018 | $Y = -0.0449x^2 + 34.47x + 14057$     | 0.99           |
| Economic profit                                | 2017 | $Y = -0.008089x^2 + 5.0527x + 1902.6$ | 0.95           |
| (USD ha <sup>-1</sup> )                        | 2018 | $Y = -0.008777x^2 + 5.3299x + 1846$   | 0.98           |
| Ecological profit                              | 2017 | $Y = -0.010102x^2 + 5.009x + 1857.5$  | 0.90           |
| (USD ha <sup>-1</sup> )                        | 2018 | $Y = -0.010789x^2 + 0.5286x + 1801$   | 0.97           |
| $\Delta_{\text{Soil}}(\text{NO}_3^--\text{N})$ | 2017 | $Y = 0.5191x - 95.03$                 | 0.98           |
| (kg N ha <sup>-1</sup> )                       | 2018 | $Y = 0.4878x - 91.03$                 | 0.98           |

Note:  $Y$  is the objective yield, and  $x$  is N application rate.
